# Supplementary material
Source: HighWire-hosted journal article supplement (https://www.g3journal.org/content/suppl/2017/08/23/g3.117.300188)

**AXB / BXA**

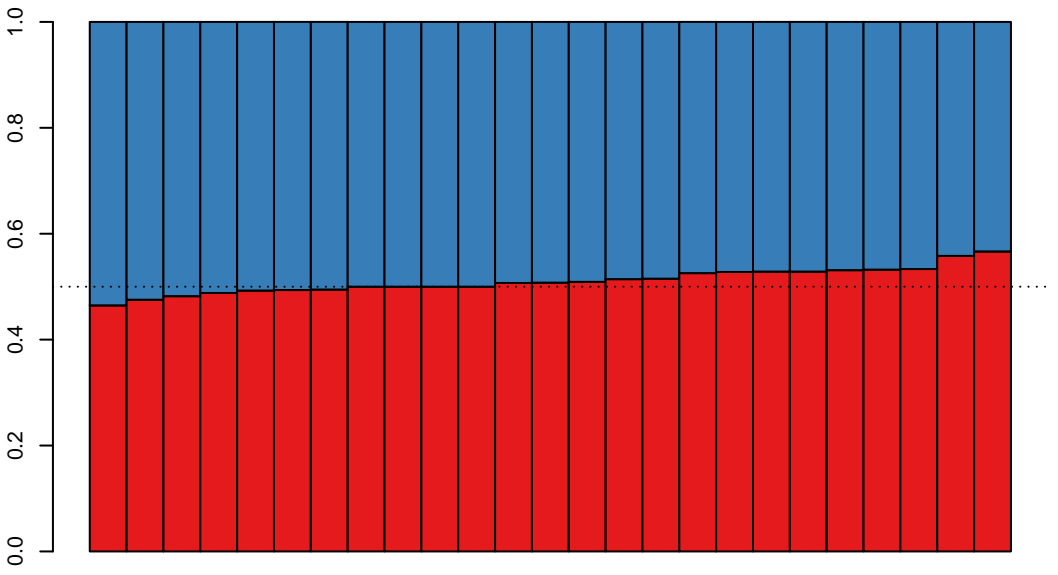

**BXD**

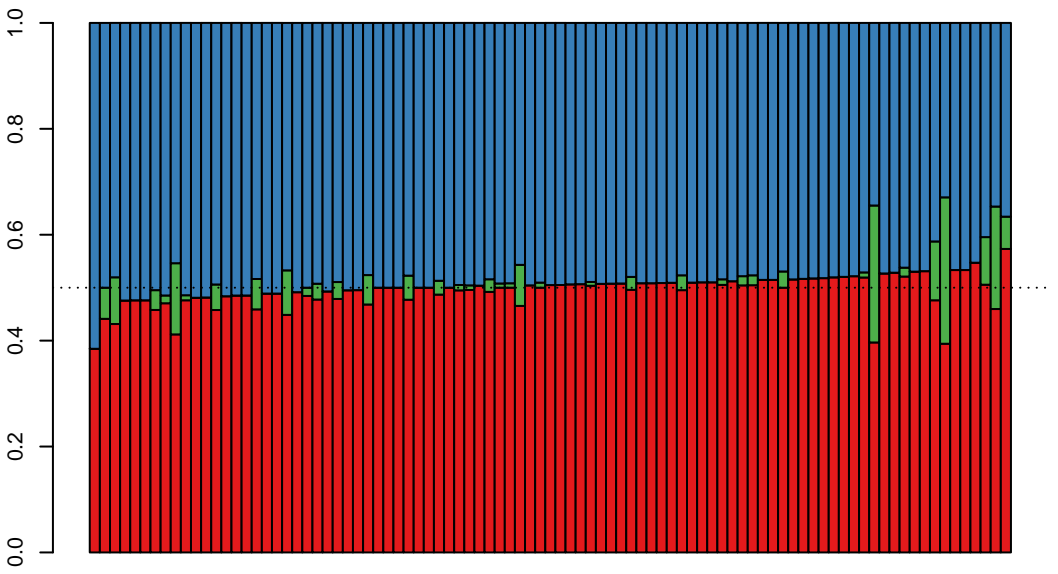

**LXS**

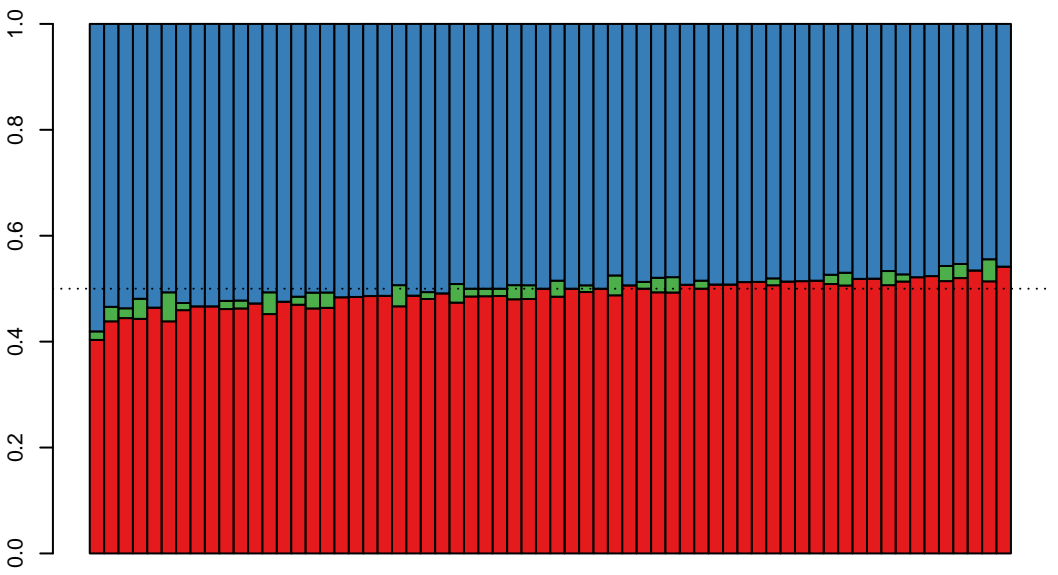

Supplement: FigureS2.pdf [file FigureS2.pdf]
